# Supplementary material
Source: PubMed Central journal article supplement (PMC3062503)
Supplement: NIHMS279883-supplement-table_1.pdf [file NIHMS279883-supplement-table_1.pdf]

Supplementary Table 1. Melting temperatures of DNA/polyamide complexes.

| DNA = 5'-CTC <b>TGTTA</b> CCA-3'                                                    |                        |                               | DNA = 5'-CTA <b>TGTTA</b> CCA-3' |                               |                                                                                        | DNA = 5'-CTC <b>TGGCA</b> CAC-3' |                               |  |
|-------------------------------------------------------------------------------------|------------------------|-------------------------------|----------------------------------|-------------------------------|----------------------------------------------------------------------------------------|----------------------------------|-------------------------------|--|
| Polyamides                                                                          | $T_m / ^\circ\text{C}$ | $\Delta T_m / ^\circ\text{C}$ | $T_m / ^\circ\text{C}$           | $\Delta T_m / ^\circ\text{C}$ | Polyamides                                                                             | $T_m / ^\circ\text{C}$           | $\Delta T_m / ^\circ\text{C}$ |  |
| —                                                                                   | 47.3 ( $\pm 0.3$ )     | —                             | 44.0 ( $\pm 0.1$ )               | —                             | —                                                                                      | 56.0 ( $\pm 0.2$ )               | —                             |  |
| 8   | 58.2 ( $\pm 0.4$ )     | 10.9                          | 59.9 ( $\pm 0.3$ )               | 15.9                          | 11  | 64.3 ( $\pm 0.3$ )               | 8.3                           |  |
| 9   | 60.3 ( $\pm 0.3$ )     | 13.0                          | 62.0 ( $\pm 0.1$ )               | 18.0                          | 12  | 62.7 ( $\pm 0.3$ )               | 6.7                           |  |
| 10  | 58.9 ( $\pm 0.2$ )     | 11.6                          | 61.0 ( $\pm 0.2$ )               | 17.0                          | 13  | 62.0 ( $\pm 0.3$ )               | 6.0                           |  |

All values are derived from at least three melting temperature experiments, with standard deviations indicated in parentheses.  $\Delta T_m$  values are given as  $T_m$  (DNA/polyamide) -  $T_m$  (DNA).
