# Supplementary material
Source: PubMed Central journal article supplement (PMC3062503)
Supplement: NIHMS279883-supplement-table_2.pdf [file NIHMS279883-supplement-table_2.pdf]

Supplementary Table 2. Relative binding affinities for polyamides

|                                                                                   | <b>T</b><br><b>•</b><br><b>A</b> | <b>A</b><br><b>•</b><br><b>T</b> |
|-----------------------------------------------------------------------------------|----------------------------------|----------------------------------|
| 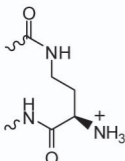  | <b>1.0</b>                       | <b>1.4</b>                       |
|   | <b>1.0</b>                       | <b>2.7</b>                       |
|  | <b>1.0</b>                       | <b>1.6</b>                       |

Relative binding affinities are reported as ratios of binding affinities ( $K_a$ ) as determined by DNase I footprinting titration experiments for polyamides targeting 5'-WGWWW-3'. Sites containing G•C and C•G at the hairpin position have relative affinities  $< 0.01$  (not shown).
