# Supplementary material
Source: PubMed Central journal article supplement (PMC3062503)
Supplement: NIHMS279883-supplement-table_3.pdf [file NIHMS279883-supplement-table_3.pdf]

Supplementary Table 3. Melting temperatures of DNA/polyamide complexes.

| DNA = 5'-CTATGGTTGAC-3'                                                                     |                        |                               |  |
|---------------------------------------------------------------------------------------------|------------------------|-------------------------------|--|
| Polyamides                                                                                  | $T_m / ^\circ\text{C}$ | $\Delta T_m / ^\circ\text{C}$ |  |
| —                                                                                           | 46.7 ( $\pm 0.4$ )     | —                             |  |
| <b>6R</b>  | 57.4 ( $\pm 0.4$ )     | 10.7                          |  |
| <b>7R</b>  | 55.1 ( $\pm 0.1$ )     | 8.4                           |  |
| <b>6S</b>  | 52.3 ( $\pm 0.2$ )     | 5.6                           |  |
| <b>7S</b>  | 55.4 ( $\pm 0.2$ )     | 8.7                           |  |

All values are derived from at least three melting temperature experiments, with standard deviations indicated in parentheses.  $\Delta T_m$  values are given as  $T_m(\text{DNA/polyamide}) - T_m(\text{DNA})$ .
