# Supplementary material
Source: PubMed Central journal article supplement (PMC3062503)
Supplement: NIHMS279883-supplement-table_4.pdf [file NIHMS279883-supplement-table_4.pdf]

Supplementary Table 4. Binding affinities ( $M^{-1}$ ) for polyamides

|           | 5'-ATGGTT-3'                | 5'-ATGGTA-3'                | 5'-ATGGTC-3'                | 5'-ATGGTG-3'                |
|-----------|-----------------------------|-----------------------------|-----------------------------|-----------------------------|
| <b>6R</b> | $2.1 (\pm 0.4) \times 10^8$ | $2.0 (\pm 0.5) \times 10^8$ | $< 10^7$                    | $< 10^7$                    |
| <b>7R</b> | $5.3 (\pm 1.1) \times 10^7$ | $4.5 (\pm 0.6) \times 10^7$ | $< 10^7$                    | $< 10^7$                    |
| <b>6S</b> | $2.6 (\pm 0.6) \times 10^7$ | $3.4 (\pm 1.2) \times 10^7$ | $3.6 (\pm 1.1) \times 10^7$ | $2.0 (\pm 0.7) \times 10^7$ |
| <b>7S</b> | $6.1 (\pm 2.3) \times 10^7$ | $3.9 (\pm 1.3) \times 10^7$ | $3.5 (\pm 1.2) \times 10^7$ | $< 10^7$                    |

Equilibrium association constants are reported as mean values from three DNase I footprinting titration experiments. Standard deviations are shown in parentheses. Affinities  $< 10^7$  cannot be determined.
